# Supplementary material for: Reliability and Validity Estimate of the Pro-Inflammatory/Anti-Inflammatory Food Intake Score in South American Pediatric Population: SAYCARE Study
Source: MDPI journal article supplement (doi:10.3390/ijerph20021038), 2023-01-06
Supplement: s1 [file s1]

## Supplementary Material

**Supplementary Table S1.** Different types of fruits and vegetables reported at the 24-hour dietary recall.

| Fruits                        | Vegetables             |
|-------------------------------|------------------------|
| 1. Avocado                    | 1. Asparagus           |
| 2. Apple                      | 2. Baked potato        |
| 3. Banana                     | 3. Beetroot            |
| 4. Fruit Salad                | 4. Black beans         |
| 5. Green grape                | 5. Broccoli            |
| 6. Mango                      | 6. Brown beans         |
| 7. Melon                      | 7. Cabbage             |
| 8. Natural Carrot Juice       | 8. Cabbage (green col) |
| 9. Natural coconut water      | 9. Carrot              |
| 10. Natural lemon juice       | 10. Chard              |
| 11. Natural Orange Juice      | 11. Chayote            |
| 12. Orange                    | 12. Corn on the cob    |
| 13. Papaya                    | 13. Cucumber           |
| 14. Papaya “ <i>Formosa</i> ” | 14. Eggplant           |
| 15. Peach                     | 15. Garlic             |
| 16. Pear                      | 16. Ginger             |
| 17. Plum                      | 17. Lentil             |
| 18. Purple grape              | 18. Lettuce            |
| 19. Strawberry                | 19. Maize, corn        |
| 20. Tangerine                 | 20. Mushroom           |
| 21. Tomato                    | 21. Onion              |
| 22. Watermelon                | 22. Peas               |
|                               | 23. Pepper             |
|                               | 24. Pumpkin            |
|                               | 25. Roasted potatoes   |
|                               | 26. Spinach            |
|                               | 27. Sweet potato       |
|                               | 28. Vegetable soup     |
|                               | 29. White beans        |
|                               | 30. Zucchini           |

**Supplementary Table S2.** Characteristics of children and adolescents from a sub-sample for reliability and validity analyses of the SAYCARE Study.

| Independent variables           | Reliability |              |              |              | Criterion Validity |              |             |              | Criterion Validity |              |             |              |
|---------------------------------|-------------|--------------|--------------|--------------|--------------------|--------------|-------------|--------------|--------------------|--------------|-------------|--------------|
|                                 | Children    |              | Adolescent s |              | Children           |              | Adolescents |              | Children           |              | Adolescents |              |
|                                 | (n = 149)   |              | (n=102)      |              | (n = 257)          |              | (n=146)     |              | (n = 69)           |              | (n=33)      |              |
|                                 | % or Mean   | (95% CI)     | % or Mean    | (95% CI)     | % or Mean          | (95% CI)     | % or Mean   | (95% CI)     | % or Mean          | (95% CI)     | % or Mean   | (95% CI)     |
| <b>Age</b>                      | 6.8         | (6.4; 7.2)   | 14.5         | (14.0; 14.9) | 6.7                | (6.4; 7.0)   | 14.5        | (14.1; 14.9) | 8.2                | (7.7; 8.6)   | 15.1        | (14.4; 15.8) |
| <b>Biological Sex</b>           |             |              |              |              |                    |              |             |              |                    |              |             |              |
| Female                          | 54.4        | (46.3; 62.2) | 55.8         | (46.0; 65.3) | 56.4               | (50.3; 62.4) | 50.7        | (42.5; 58.8) | 47.8               | (36.2; 59.7) | 48.5        | (31.6; 65.7) |
| Male                            | 45.3        | (37.8; 53.7) | 44.1         | (34.7; 54.0) | 43.6               | (37.6; 49.7) | 49.3        | (41.2; 57.4) | 52.2               | (40.3; 63.8) | 51.5        | (34.3; 68.4) |
| <b>Type of School</b>           |             |              |              |              |                    |              |             |              |                    |              |             |              |
| Public                          | 58.4        | (50.3; 66.1) | 31.4         | (23.0; 41.1) | 51.4               | (45.2; 57.5) | 43.8        | (36.0; 52.0) | 46.4               | (34.8; 58.3) | 27.3        | (23.0; 41.1) |
| Private                         | 41.6        | (33.9; 49.7) | 68.2         | (58.8; 77.0) | 48.7               | (42.5; 54.8) | 56.1        | (48.0; 64.1) | 52.1               | (41.7; 65.2) | 72.7        | (54.6; 85.5) |
| <b>Nutritional Status</b>       |             |              |              |              |                    |              |             |              |                    |              |             |              |
| Thinness                        | 6.7         | (3.6; 12.1)  | 3.9          | (1.5; 10.1)  | 5.8                | (3.5; 9.5)   | 2.7         | (1.0; 7.1)   | 2.9                | (0.4; 19.3)  |             |              |
| Normal Weight                   | 67.1        | (59.1; 74.2) | 62.7         | (52.9; 71.7) | 70.4               | (64.5; 75.7) | 65.1        | (56.9; 72.4) | 73.6               | (55.7; 86.0) | 66.7        | (48.5; 80.9) |
| Overweight                      | 17.4        | (12.1; 24.5) | 26.5         | (18.7; 36.0) | 13.2               | (9.6; 18.0)  | 24          | (17.7; 31.6) | 17.6               | (7.9; 34.9)  | 33.3        | (19.1; 51.5) |
| Obesity                         | 8.7         | (5.11; 14.5) | 6.8          | (3.3; 13.8)  | 10.5               | (7.3; 14.9)  | 8.2         | (4.7; 14.0)  | 5.9                | (1.4; 21.6)  |             |              |
| <b>Waist circumference (cm)</b> | 57.3        | (55.9; 58.8) | 74.1         | (72.4; 75.7) | 57.7               | (56.7; 58.7) | 74.3        | (72.7; 75.9) | 59.1               | (57.1; 61.1) | 74.6        | (72.4; 76.8) |
| <b>hs-CRP (mg/dl)</b>           |             |              |              |              |                    |              |             |              | 0.6                | (0.38; 0.82) | 0.32        | (0.2; 0.6)   |

95%CI= 95% confidence interval; BMI= Body Mass Index; WC= Waist circumference; hs-CRP= High sensitive C-reactive protein.

**Supplementary Table S3.** Reliability of the PAIFIS in grams per day in a sub-sample of the SAYCARE Study.

| Children                           |     |       |                |       |                |             | Adolescents |       |                |       |                |             |
|------------------------------------|-----|-------|----------------|-------|----------------|-------------|-------------|-------|----------------|-------|----------------|-------------|
| FFQ1                               |     |       |                |       |                |             | FFQ2        |       |                |       |                |             |
|                                    | n   | Mean  | (95% CI)       | Mean  | (95% CI)       | $\rho^*$    | n           | Mean  | (95% CI)       | Mean  | (95% CI)       | $\rho^*$    |
| Pro - Inflammatory food group      |     |       |                |       |                |             |             |       |                |       |                |             |
| Sugar-Sweetened Beverages          | 146 | 274.1 | (212.1; 336.1) | 253.9 | (193.0; 314.9) | <b>0.66</b> | 97          | 346.7 | (276.9; 416.5) | 297.7 | (236.7; 358.7) | <b>0.59</b> |
| Processed Meat                     | 126 | 23    | (19.7; 26.3)   | 21.8  | (18.8; 24.8)   | <b>0.63</b> | 93          | 28.7  | (23.1; 34.2)   | 34.3  | (26.2; 42.3)   | <b>0.54</b> |
| Red meat                           | 141 | 52    | (44.2; 59.8)   | 58.8  | (48.1; 69.5)   | <b>0.54</b> | 93          | 52.2  | (35.4; 69.0)   | 55    | (41.9; 68.4)   | <b>0.57</b> |
| Candies                            | 149 | 175.9 | (146.4; 205.4) | 154.2 | (130.0; 178.3) | <b>0.51</b> | 102         | 165.8 | (139.4; 192.1) | 177.5 | (137.9; 217.0) | <b>0.31</b> |
| Snacks                             | 136 | 35.6  | (29.7; 41.5)   | 29.8  | (25.2; 34.4)   | <b>0.56</b> | 96          | 35.1  | (28.9; 41.4)   | 41    | (30.1; 51.8)   | <b>0.42</b> |
| Anti - Inflammatory food group     |     |       |                |       |                |             |             |       |                |       |                |             |
| Fruits                             | 149 | 279.8 | (242.8; 316.8) | 239.1 | (205.5; 272.6) | <b>0.58</b> | 97          | 353.5 | (272.0; 434.9) | 298.3 | (240.6; 356.0) | <b>0.53</b> |
| Vegetables                         | 133 | 50.1  | (41.5; 58.6)   | 49.2  | (39.1; 59.4)   | <b>0.59</b> | 75          | 62.5  | (40.1; 84.9)   | 50.8  | (37.1; 64.5)   | <b>0.47</b> |
| Sum groups                         |     |       |                |       |                |             |             |       |                |       |                |             |
| Pro-Inflammatory                   | 149 | 557.2 | (489.1; 625.3) | 504.2 | (435.2; 573.3) | <b>0.57</b> | 102         | 618   | (539.9; 696.1) | 580.5 | (496.6; 664.5) | <b>0.52</b> |
| Anti - Inflammatory                | 149 | 319.1 | (278.7; 359.5) | 278.5 | (241.7; 315.3) | <b>0.63</b> | 97          | 404.4 | (315.7; 493.2) | 337   | (273.9; 401.3) | <b>0.55</b> |
| PAIFIS = $\Sigma$ AI - $\Sigma$ PI | 149 | 238.1 | (166.3; 309.9) | 225.7 | (158.3; 293.2) | <b>0.69</b> | 102         | 223.3 | (121.0; 325.6) | 259.5 | (176.4; 342.7) | <b>0.61</b> |

95%CI= 95% confidence interval;  $\rho$ = Spearman rho coefficient; PCV= proportional change attributable to region-level variance; R= regression coefficient; ( $\Sigma$ PI) = Sum Pro-inflammatory food group=  $\Sigma$ AI, Sum Anti-Inflammatory food group; PAIFIS=  $\Sigma$  AI -  $\Sigma$  PI.

**Supplementary Table S4.** Convergent validity of the PAIFIS in grams per day in a sub-sample of the SAYCARE Study.

| Children                       | FFQ1 |        |                  | R24hrs |                   | p    | R*   | PCV*  |
|--------------------------------|------|--------|------------------|--------|-------------------|------|------|-------|
|                                | n    | Mean   | (95% CI)         | Mean   | (95% CI)          |      |      |       |
| Pro - Inflammatory food group  |      |        |                  |        |                   |      |      |       |
| Sugar-Sweetened Beverages      | 224  | 276.51 | (229.44; 323.59) | 575.34 | (518.9; 631.78)   | 0.22 | -    | -     |
| Processed Meat                 | 257  | 20.51  | (16.64; 24.38)   | 23.34  | (19.35; 27.33)    | 0.37 | -    | -     |
| Red meat                       | 257  | 49.3   | (42.52; 56.08)   | 56.9   | (48.90; 63.13)    | 0.31 | -    | -     |
| Candies                        | 257  | 161.43 | (140.42; 182.44) | 107.05 | (93.68; 120.42)   | 0.4  | -    | -     |
| Snacks                         | 257  | 26.21  | (22.74; 29.67)   | 43.95  | (36.15; 51.7)     | 0.28 | -    | -     |
| Anti - Inflammatory food group |      |        |                  |        |                   |      |      |       |
| Fruits                         | 232  | 41.56  | (34.50; 48.63)   | 129.47 | (115.25; 143.69)  | 0.22 | -    | -     |
| Vegetables                     | 228  | 310.46 | (278.61; 342.31) | 210.01 | (188.60; 231.42)  | 0.23 | -    | -     |
| Sum groups                     |      |        |                  |        |                   |      | -    | -     |
| Pro-Inflammatory               | 257  | 514.27 | (464.90; 563.63) | 731.82 | (668.29; 795.350) | 0.36 | -    | -     |
| Anti-Inflammatory              | 257  | 341.14 | (309.91; 372.39) | 303.19 | (273.91; 332.48)  | 0.20 | -    | -     |
| PAIFIS                         | 257  | 173.12 | (121.09; 225.16) | 428.45 | (360.79; 496.47)  | 0.23 | 0.32 | 43.34 |
| Adolescents                    | FFQ1 |        |                  | R24hrs |                   | p    | R*   | PCV*  |
|                                | n    | Mean   | (95% CI)         | Mean   | (95% CI)          |      |      |       |
| Pro - Inflammatory food group  |      |        |                  |        |                   |      |      |       |
| Sugar-Sweetened Beverages      | 133  | 371.6  | (312.09; 431.10) | 655.45 | (572.63; 738.27)  | 0.15 | -    | -     |
| Processed Meat                 | 95   | 42.51  | (32.00; 53.01)   | 51.18  | (41.51; 60.86)    | 0.09 | -    | -     |
| Red meat                       | 108  | 65.11  | (48.70; 81.52)   | 74.22  | (64.40; 84.05)    | 0.24 | -    | -     |
| Candies                        | 136  | 181.69 | (151.92; 211.47) | 80.97  | (68.33; 93.60)    | 0.18 | -    | -     |
| Snacks                         | 81   | 34.19  | (26.91; 41.47)   | 105.9  | (84.67; 127.13)   | 0.25 | -    | -     |
| Anti - Inflammatory food group |      |        |                  |        |                   |      |      |       |
| Fruits                         | 110  | 242.33 | (165.43; 319.23) | 129.85 | (105.54; 154.17)  | 0.16 | -    | -     |
| Vegetables                     | 121  | 72.56  | (55.01; 90.11)   | 68.44  | (56.52; 80.35)    | 0.17 | -    | -     |
| Sum groups                     |      |        |                  |        |                   |      | -    | -     |
| Pro-Inflammatory               | 146  | 654    | (588.39; 719.60) | 819.47 | (727.82; 911.12)  | 0.26 | -    | -     |
| Anti-Inflammatory              | 146  | 362.44 | (287.18; 437.71) | 223.35 | (187.50; 259.20)  | 0.29 | -    | -     |
| PAIFIS                         | 146  | 291.56 | (191.27; 391.84) | 596.12 | (505.97; 686.28)  | 0.16 | 0.24 | 15.45 |

95%CI= 95% confidence interval;  $\rho$ = Spearman rho coefficient; PCV= proportional change attributable to region-level variance;  $R$ = regression coefficient; ( $\Sigma$ PI) = Sum Pro-inflammatory food group=  $\Sigma$ AI, Sum Anti-Inflammatory food group; PAIFIS=  $\Sigma$  AI -  $\Sigma$  PI.

\* coefficient from multilevel regression models after adjusted for center; type of school, sex, age, and total energy intake.

**Supplementary Table S5.** Validity criterion of the PAIFIS in grams per day with hs-CRP in a sub-sample of the SAYCARE Study.

|                    |               | $\Sigma$ PI (g/day) | ( $\Sigma$ AI) (g/day) | PAIFIS (g/day)     |
|--------------------|---------------|---------------------|------------------------|--------------------|
| Children (n=69)    | Mean $\pm$ SD | 447.70 $\pm$ 30.63  | 314.70 $\pm$ 39.44     | 132.97 $\pm$ 51.29 |
|                    | (95%CI)       | (386.56 - 508.80)   | (236.01 - 393.40)      | (30.62 - 235.33)   |
|                    | $\rho$        | 0.01                | 0.03                   | -0.03              |
|                    | $R^*$         | -                   | -                      | 0.48               |
|                    | PCV*          | -                   | -                      | 43.94              |
|                    |               |                     |                        |                    |
| Adolescents (n=33) | Mean $\pm$ SD | 536.75 $\pm$ 56.57  | 291.33 $\pm$ 55.78     | 245.43 $\pm$ 67.58 |
|                    | (95%CI)       | (421.53 - 651.98)   | (177.73 - 404.94)      | (107.77 - 383.08)  |
|                    | $\rho$        | 0.16                | 0.07                   | 0.24               |
|                    | $R^*$         | -                   | -                      | 0.33               |
|                    | PCV*          | -                   | -                      | 61.70              |
|                    |               |                     |                        |                    |

hs-CRP= High sensitive C-reactive protein; 95%CI= 95% confidence interval;  $\rho$ = Spearman rho coefficient; PCV= proportional change attributable to region-level variance;  $R$ = regression coefficient; ( $\Sigma$ PI) = Sum Pro-inflammatory food group=  $\Sigma$ AI, Sum Anti-Inflammatory food group; PAIFIS=  $\Sigma$  AI -  $\Sigma$  PI.

\*coefficient from multilevel regression models after adjusted for center; type of school, sex, age, and total energy intake.
